# Supplementary material
Source: PubMed Central journal article supplement (PMC7245098)
Supplement: pnas.1912866117.sapp.pdf [file pnas.1912866117.sapp.pdf]

# PNAS

[www.pnas.org](http://www.pnas.org)

Supplementary Information for

## **NOD2 modulates immune tolerance via the GM-CSF-dependent generation of CD103<sup>+</sup> Dendritic Cells**

David Prescott, Charles Maisonneuve, Jitender Yadav, Stephen J. Rubino, Stephen E. Girardin and Dana J. Philpott

Dana J. Philpott

Email: [dana.philpott@utoronto.ca](mailto:dana.philpott@utoronto.ca)

### **This PDF file includes:**

Supplementary Methods  
Figures S1 to S11  
Tables S1 to S2  
SI References

## Supplementary Methods

### Mice

All animals were maintained under specific pathogen-free conditions at the University of Toronto Department of Comparative Medicine. In some cases, age- and sex-matched C57Bl/6J wild-type mice were purchased from Jackson Laboratories and used at 6-10 weeks of age. Otherwise, mice were obtained from their respective suppliers and bred in-house to control for littermate effects. *Nod2* (kind gift from Drs. Marco Giovannini and Jean-Pierre Hugot), *Nod1* (Millenium Pharmaceuticals), *Rip2* (kind gift from Dr. Richard Flavell), *CSF2* (Jackson Labs), and *Batf3* knockout mice (kind gift from Dr. Jennifer Gommerman) were maintained in a +/- by +/- breeding system. Tissue-specific knockout of *Nod2* was generated by crossing *Nod2<sup>fl/fl</sup>* mice (kind gift from Dr. Philip Rosenstiel) with *Itgax-Cre* (CD11c-Cre; dendritic cell specific; Jackson Labs) or *Lyz2-Cre* (Lysozyme M-Cre; myeloid cells; Jackson Labs), and maintaining these mice in a Cre+ by Cre- breeding system. All mouse experiments were conducted as approved by the University of Toronto Animal Care Committee in accordance with the regulations set by the Canadian Council of Animal Care.

### Injections and Vaccinations

Muramyl Dipeptide (Invivogen), FK-156 (Fujiisawa, Inc. (Japan)), LPS-EB Ultrapure (Invivogen), Pam3CSK4 (Invivogen), recombinant Flagellin (Invivogen), Zymosan A from *Saccharomyces cerevisiae* (Millipore Sigma), EndoFit Ovalbumin (Invivogen), Complete Freund's adjuvant (Millipore Sigma), and recombinant GM-CSF (Biolegend) were purchased from their respective suppliers and prepared at the doses indicated in the text in sterile PBS prior to being administered to mice via injection into the peritoneal cavity. Intrarectal administration of MDP and 50% ethanol was performed by anaesthetizing animals under gaseous isofluorane before inserting a plastic catheter 3cm into the anus and slowly injecting 100µl of fluid directly into the colon lumen. Mice were inverted during the recovery from anaesthetic to facilitate the retention of fluid in the colon lumen.

### Tissue Collection

To prepare single cell suspensions of Splenocytes, MLN cells and thymocytes, organs were excised and infused with 500ul of 2mg/ml Collagenase D (Roche) and 0.5mg/ml DNase I (Roche) in PBS prior to being minced into small pieces and incubated at 37°C for 20 minutes. This preparation was then passed through a 70µM nylon filter, and the remaining solid tissue mashed through the filter with the plunger of a 3ml syringe. For the spleen, red blood cells were then lysed using ammonium chloride lysis buffer (100mM NH<sub>4</sub>CL, 10mM KHCO<sub>3</sub>, 0.1mM Na<sub>2</sub>EDTA). Peritoneal exudate cells were collected by injecting 3ml of ice-cold PBS containing 3% fetal bovine serum into the peritoneal cavity, briefly massaging the region, and collecting the resulting lavage in a 50ml tube. Lamina propria cells were collected by dividing colons into 1-2cm pieces, removing mucous with 5mM DTT in HBSS, removing epithelial cells with 5mM EDTA, then finally mincing the tissue into fine pieces and digesting with 0.2U/ml Liberase TM (Roche) and 200U/ml DNase I (Roche) for 30 minutes. Digested pieces were then triturated through a 21g needle and filtered through a tube-top strainer to remove debris.

### **Flow Cytometry**

Single cell suspensions were stained with LIVE/DEAD fixable aqua dead cell stain (ThermoFisher) to exclude dead cells and debris, as per the manufacturer's instructions. Suspensions were then incubated with Anti-Mo CD16/CD32 (ThermoFisher, Clone 93) in flow cytometry staining buffer (0.3%FBS, 0.1% NaAzide) to block non-specific binding of antibodies by Fc receptors, prior to staining for surface antigens with the antibodies listed in Table S1 (See *SI Appendix*). For intracellular FOXP3 analysis, cells were surface stained as above prior to fixation and permeabilization of the cellular suspensions with eBioscience Foxp3/Transcription Factor Staining Kit (ThermoFisher) as per the manufacturer's instructions. Flow cytometric analysis was performed using the LSRFortessa Cell Analyzer (BD Biosciences) running FACSDiva acquisition software, and data analyzed using FlowJo v10.

### **Adoptive Transfer Experiments**

Single-cell suspensions of purified OT1 T-cells and OT2 T-cells were produced by magnetic sorting of splenocytes collected from respective mice using the CD8a<sup>+</sup> or CD4<sup>+</sup> T Cell Isolation kits, mouse (Miltenyi Biotec). Recipient mice were injected with  $5 \times 10^5$  cells via the tail vein, and injected with 50 $\mu$ g of Endofit Ovalbumin  $\pm$  MDP 24h later. Eight days later, mice were again injected with 50 $\mu$ g of Endofit Ovalbumin prior to tissue collection at day 11.

### **Bone Marrow Chimeras.**

Bone marrow chimeras were created by lethally irradiating recipient mice with 2 rounds of 550cGy  $\gamma$ -irradiation (Gammacell-40, Nordion) separated by 4 hours. Bone marrow from sex-matched donors was collected from femurs and tibias, lysed of red blood cell content with ACK lysis buffer, and  $4 \times 10^6$  cells injected into recipient mice via the tail vein. Mice were maintained on 2g/L neomycin sulfate (Sigma-Aldrich) for 2 weeks, and rested for a subsequent 6 weeks to ensure the reconstitution of the hematopoietic compartment.

### **Quantitative RT-PCR**

Sections of spleen and parietal peritoneum ( $\approx 1 \text{ cm}^2$ ) or colon (3cm from the anus) were excised and homogenized in RLT lysis buffer (Qiagen) using a bead beater homogenizer. RNA was extracted from lysates using the RNeasy Mini Kit (Qiagen) per the manufacturer's instructions. Genomic DNA was removed from the sample using the Turbo DNase-free kit (Invitrogen), and RNA reverse transcribed with the Superscript IV RT kit (Invitrogen). One  $\mu$ g of total cDNA was added in triplicate to each qPCR reaction containing PowerUP SYBR Green master mix (Applied Biosystems) and 250 $\mu$ M specific primers (See *SI Appendix* Table S2), and run on a CFX384 Touch Real-Time thermal cycler (Bio-Rad). Relative gene expression was determined by the delta-delta Ct method, with 18s rRNA used as the housekeeping control.

### **DC Sorting and Affymetrix Microarray**

C57Bl/6 mice were injected subcutaneously with  $5 \times 10^6$  FLT3L-expressing B16 melanoma cells (generous gift from Dr. Philippe Poussier) in order to boost endogenous

levels of cDC1s (64). Five days later, spleens were isolated and single cell suspensions isolated as above. Dendritic cells were purified from this preparation by magnetic sorting using the Pan Dendritic Cell Isolation Kit (Miltenyi Biotec), and sorted into respective groups (see figure 6) via fluorescent sorting using a FACS Aria IIIu (BD Biosciences). RNA was isolated from each sample using the RNeasy Micro RNA extraction kit (Qiagen), and samples submitted to The Centre for Applied Genomics (TCAG) at The Hospital for Sick Children (Toronto, Canada) for Microarray Analysis. Briefly, samples were assessed for RNA integrity with the 2100 Bioanalyzer (Agilent), and suitable samples prepared with the WT Pico kit (Affymetrix) and hybridized on GeneChip Mouse Gene 2.0 microarray chips (Affymetrix) according to the manufacturer's instructions. Microarray data was normalized with the Robust Multi Array (RMA) method, and differential gene expression analysis performed using the open-source software geWorkbench (retrieved from: <http://wiki.c2b2.columbia.edu/workbench/index.php/Home>).

Data were pre-processed by filtering out probesets that lacked Entrez gene IDs, and for probesets with expression levels lesser than 5.0. Significantly altered probesets were determined by ANOVA followed by a step-down Holm-Bonferroni procedure. Gene Set Enrichment Analysis was performed using open-source software obtained from the Broad institute (retrieved from: <http://software.broadinstitute.org/gsea/index.jsp>), while Cell-Type Enrichment Analysis was performed using Cten, a web-based analytical tool identifying enriched cell types from microarray data (retrieved from: <http://www.influenza-x.org/~jshoemaker/cten/>, see reference (65))

#### ***In vivo* BrdU incorporation assay**

Mice were injected i.p. with 1 $\mu$ g of Bromo-deoxyuridine (BrdU) in 100 $\mu$ L of PBS  $\pm$  MDP, and BrdU concentrations maintained by including 0.8mg/ml BrdU in the drinking water. 24h later, spleens were harvested and analyzed for single-cell BrdU incorporation by flow cytometry using the BrdU for Flow Cytometry Staining Kit (eBioscience).

#### **Statistical Analysis and Data Presentation**

Statistical analysis was performed using Prism 6 (Graphpad Software) and the tests applied are described in the figure legends. Heatmaps were created using Heatmapper, an open-source online data presentation tool (retrieved from <http://www.heatmapper.ca/>, see reference (66)). Bar charts were created with DataGraph (Visual Data Tools, Inc.).

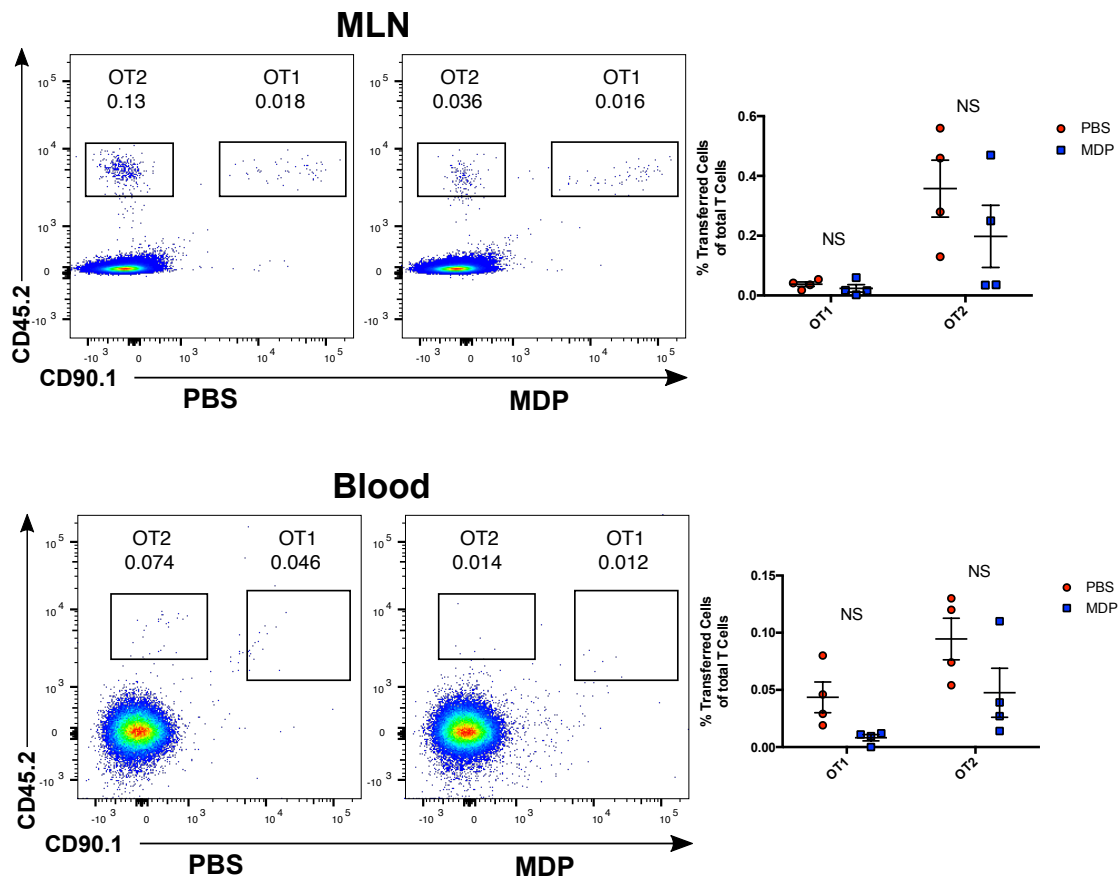

**Fig. S1: MDP does not induce tissue sequestration of adoptively transferred transgenic T cells.** Mice were adoptively transferred with OT1 (CD45.2<sup>+</sup>CD90.1<sup>+</sup>) and OT2 (CD45.2<sup>+</sup>) cells and treated as in Figure 1d. Proportions of transferred cells in the MLN and Blood of individual CD45.1 recipient mice 3-days following re-challenge with ultrapure ovalbumin as assessed by flow cytometry from 1 representative experiment are shown. NS signifies no statistical significance between groups.

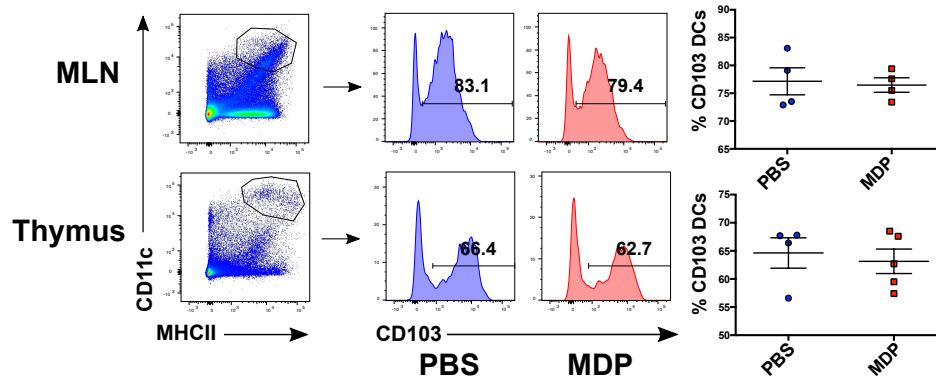

**Fig. S2: Systemic administration of MDP does not alter CD103 expression on MLN or Thymic DCs** Flow cytometry analysis of CD103 expression on CD11c<sup>+</sup>MHCII<sup>+</sup> cells from murine mesenteric lymph nodes and thymus following injection with MDP (50µg i.p.).

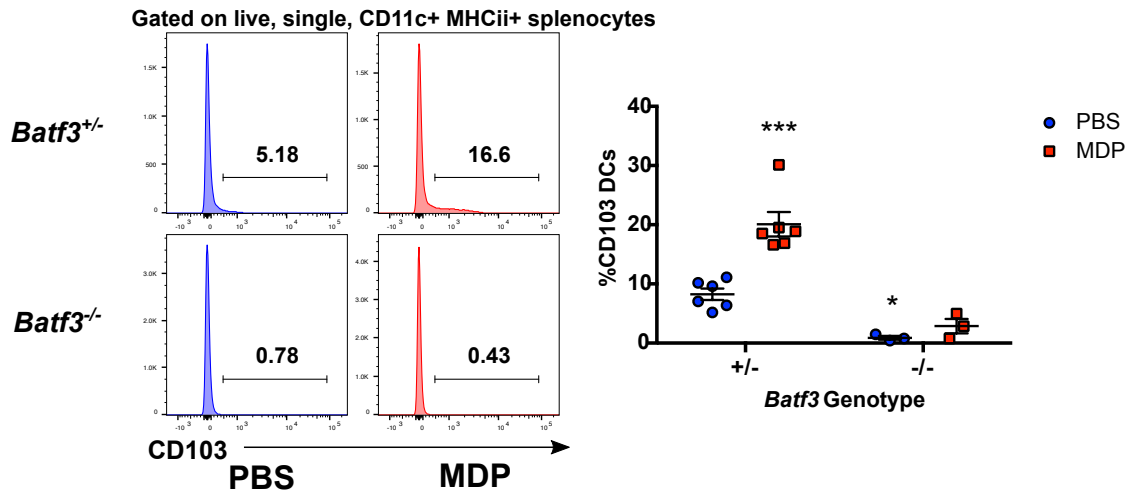

**Fig. S3: MDP-induced increases in CD103 expression occur on BATF3-dependent cDC1 cells.** CD103 expression on splenic dendritic cells following injection of MDP in mice lacking the transcription factor Batf3 (*Batf3*<sup>-/-</sup>) or their heterozygote littermates (*Batf3*<sup>+/-</sup>). Individual mice from two representative litters are denoted on the plots. Horizontal bars denote the mean, and error bars denote SEM. Asterisks denote significantly different from PBS-treated *Batf3*<sup>+/-</sup> mice as calculated by two-way ANOVA followed by Tukey's multiple comparisons test; \* =  $p < 0.05$ ; \*\*\* =  $p \leq 0.001$ .

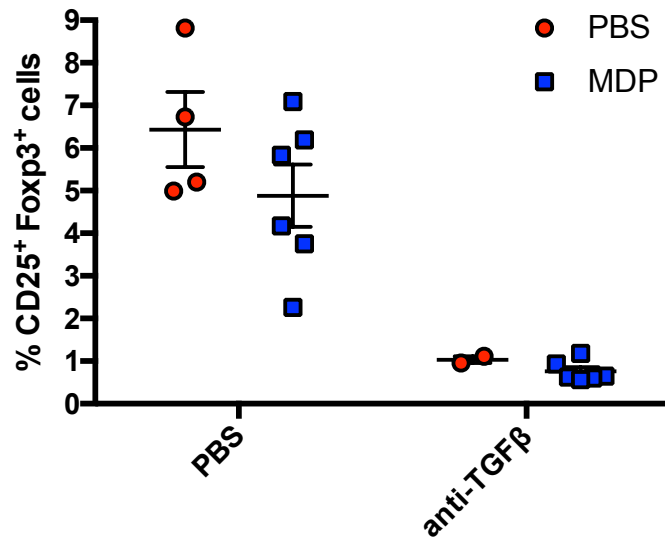

**Fig. S4: Purified splenic CD205<sup>+</sup>CD8α<sup>+</sup> DCs spontaneously generate FoxP3<sup>+</sup>CD25<sup>+</sup> Tregs from naïve T cells when presenting cognate antigen.** CD103<sup>low</sup> cDC1 cells were FACS-sorted from the spleens of PBS-injected mice and CD103<sup>high</sup> cells were sorted from the spleens MDP-injected mice (20,000 cells/well) and loaded with .03μg/ml OVA peptide (323-336). These cells were then co-cultured with MACS-purified naïve CD4 T cells collected from the spleens of OT2 mice (20,000 cells/well) in the presence or absence of 10μg/ml TGF-β neutralizing antibody for 5 days. CD4 T cells were then analyzed for FoxP3 and CD25 expression by flow cytometry to confirm the induction of Tregs.



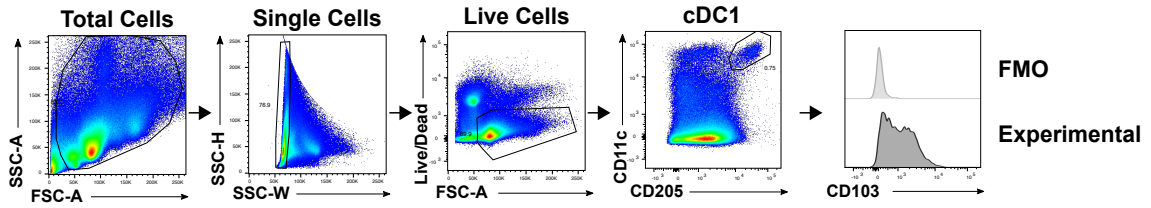

**Fig. S5: Gating strategy employed to identify CD103+ cDC1s.** For flow cytometry analysis, cDC1s are defined as live, single, CD205<sup>+</sup> CD11c<sup>+</sup> cells as shown in this example gating strategy. Further analysis identifies surface marker positive cells by setting gate borders using fluorescence minus one controls (FMO).

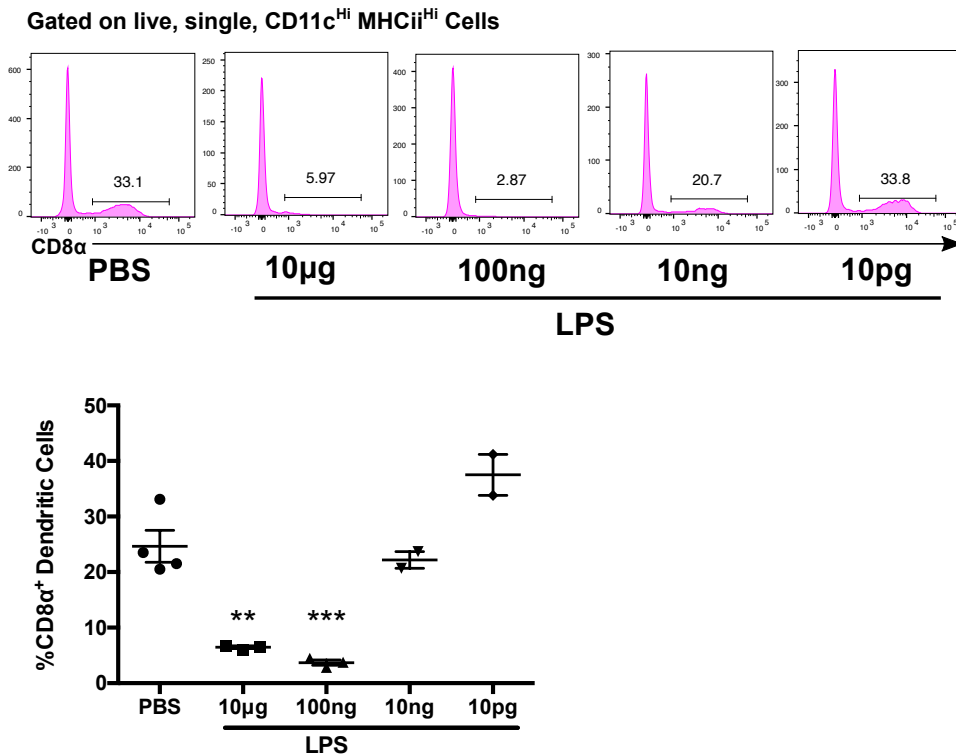

**Fig. S6: LPS induces a dose-dependent disappearance of CD8α-expressing DCs.** C57Bl/6 mice were injected with doses of LPS ranging from 10μg to 10pg, and splenocytes harvested 16h later and assessed by flow cytometry. Histograms show the proportion of dendritic cells (CD11c<sup>hi</sup>MHCii<sup>hi</sup>) that express CD8α at each dose of LPS. Data below show individual mice from one representative experiment. Horizontal bars denote the mean, and error bars denote SEM. Asterisks denote significantly different from PBS as calculated one-way ANOVA followed by Tukey's multiple comparisons test; \*\* = P≤0.01; \*\*\* = P≤0.001.

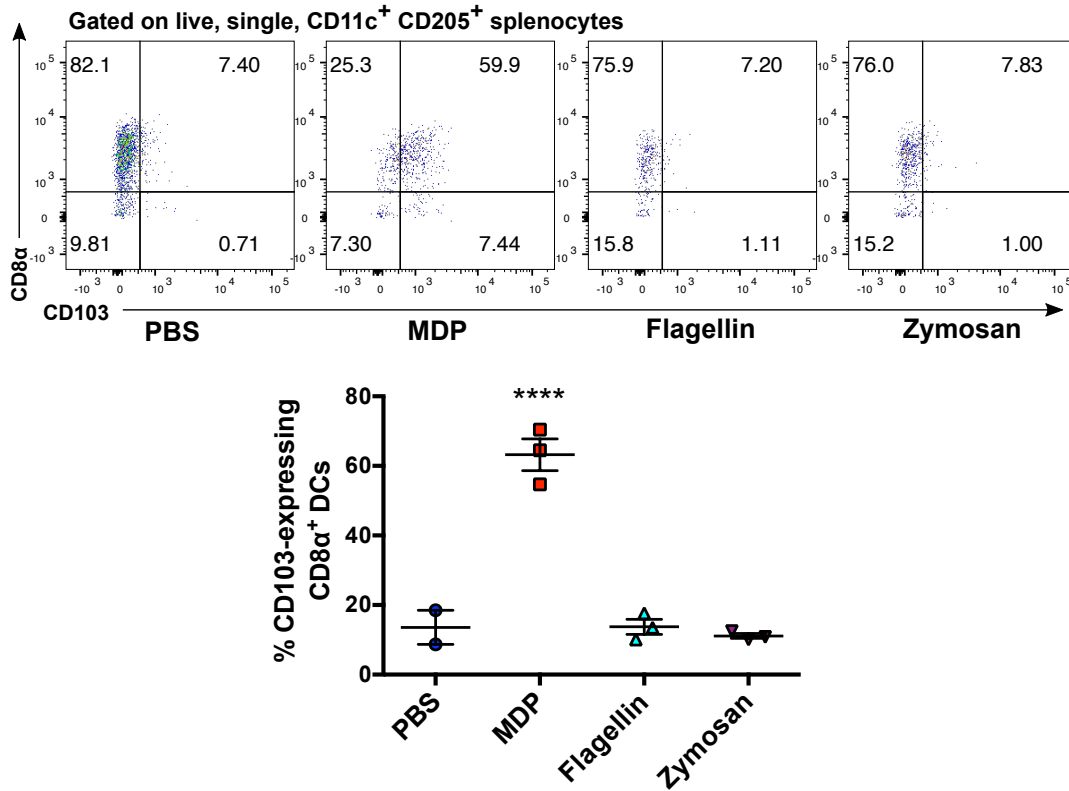

**Fig. S7: Additional TLR ligands do not upregulate CD103 on splenic cDC1s.** C57Bl/6 mice were injected i.p. with MDP (50μg), the TLR5 Ligand Flagellin (20μg), or the TLR2/6 ligand zymosan (10μg) or PBS vehicle control, and CD103 expression on splenic cDC1s assessed 16h later. DC subset marker and CD103 gate borders were drawn using fluorescence minus one (FMO) controls. Individual mice from one representative experiment are shown on each graph. Horizontal bars denote the mean, and error bars denote SEM. Asterisks denote significantly different from PBS as calculated by Student's T-test; \*\*\*\* =  $P \leq 0.0001$

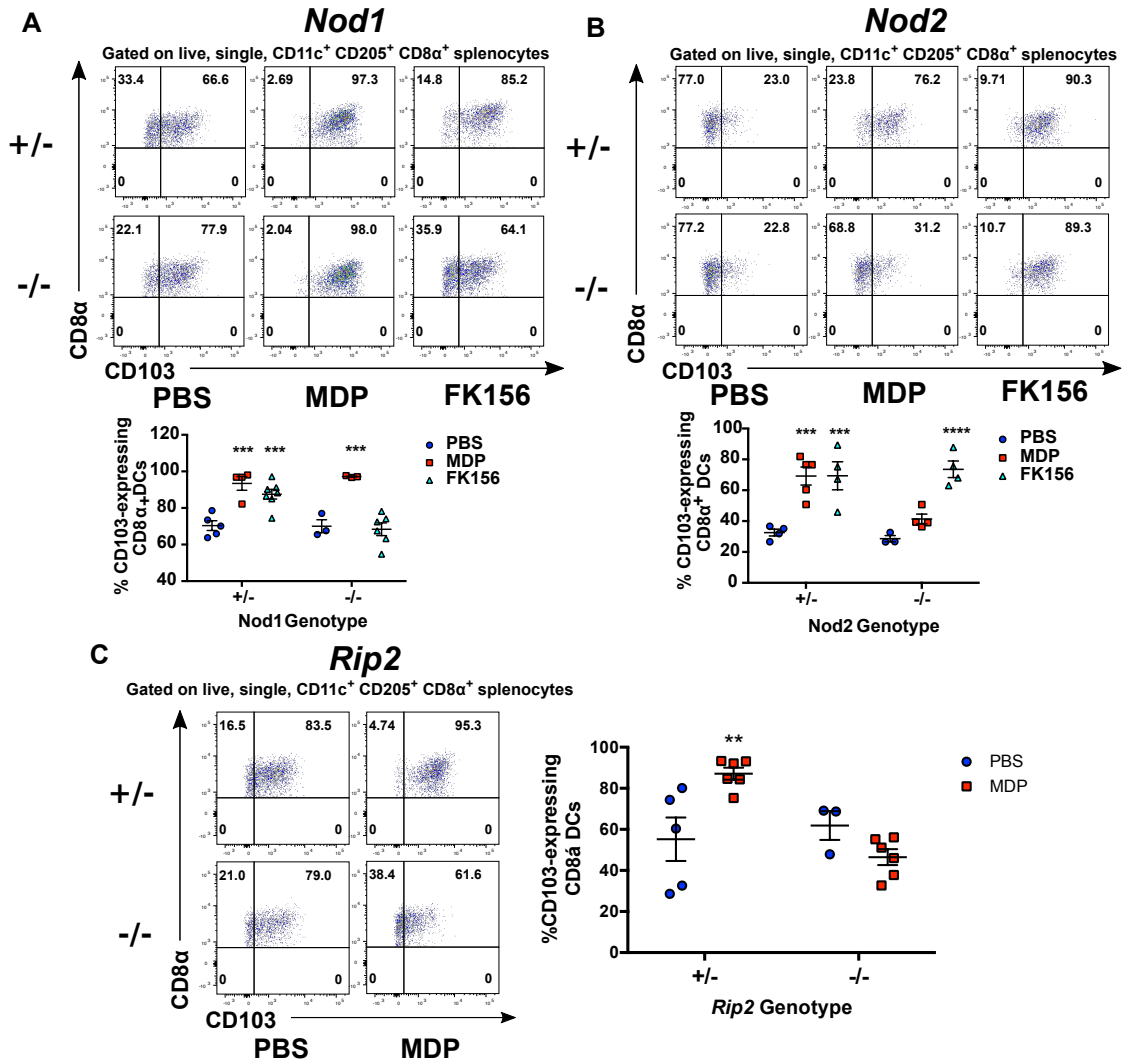

**Fig. S8: FK156 and MDP induce CD103 specifically via activation of NOD1 and NOD2 in a RIP2-dependent manner.** Flow cytometry analysis of CD103 expression by splenic CD8α<sup>+</sup> cDC1s collected from mice deficient for (A) *Nod1* (*Nod1*<sup>-/-</sup>) or (B) *Nod2* (*Nod2*<sup>-/-</sup>), along with their littermate heterozygous controls (*Nod1*<sup>+/-</sup> or *Nod2*<sup>+/-</sup>) following injection with MDP (50μg) or FK156 (50μg). Individual mice from 3 pooled litters are shown on each graph. (C) Flow cytometry analysis of CD103 expression on splenic CD8α<sup>+</sup> cDC1s collected from mice deficient in *Rip2* (*Rip2*<sup>-/-</sup>) or their heterozygote littermates (*Rip2*<sup>+/-</sup>) following injection with MDP (50μg). Individual mice from 2 pooled litters are shown on the graph. Horizontal bars denote the mean, and error bars denote SEM. Asterisks denote significantly different from PBS-treated heterozygote littermates as determined by one-way ANOVA followed by Tukey's multiple comparisons test; \*\* =  $p \leq 0.01$ ; \*\*\* =  $p \leq 0.001$ ; \*\*\*\* =  $p \leq 0.0001$ .

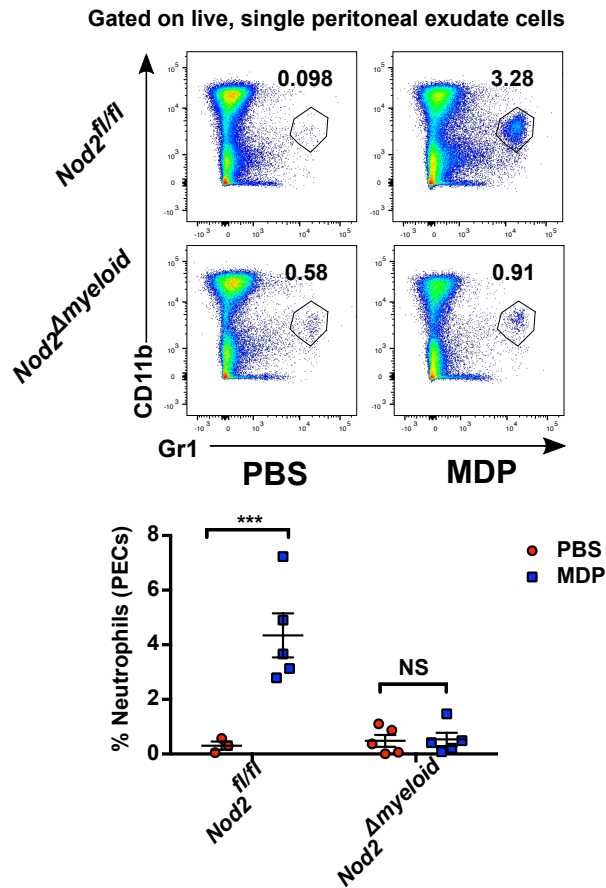

**Fig S9.** Flow cytometry analysis determining the proportion of neutrophils (CD11b<sup>mid</sup>Gr1<sup>hi</sup>) found in peritoneal lavages collected from *Nod2<sup>Δmyeloid</sup>* and their *Nod2<sup>fl/fl</sup>* littermates 16h post-injection with MDP (50μg). Individual mice from two pooled litters are shown on the graph. Horizontal bars denote the mean, and error bars denote SEM. Asterisks denote significantly different from *Nod2<sup>fl/fl</sup>* littermate-matched PBS as determined by two-way ANOVA followed by Tukey's multiple comparisons test; \*\*\* =  $p \leq 0.001$ . NS denotes no statistical significance between linked groups.

**a**

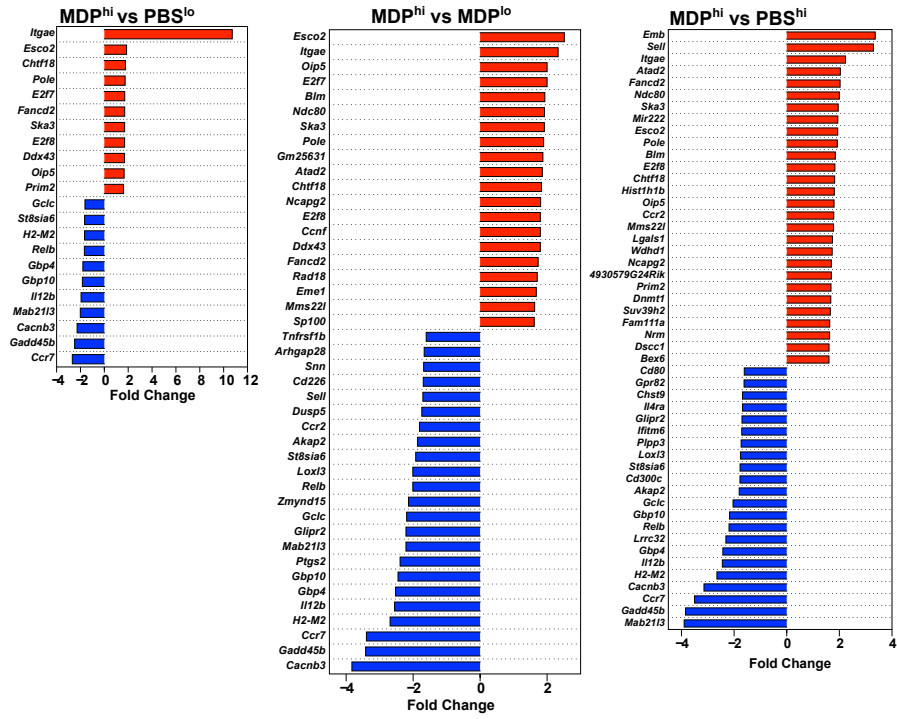

**b**

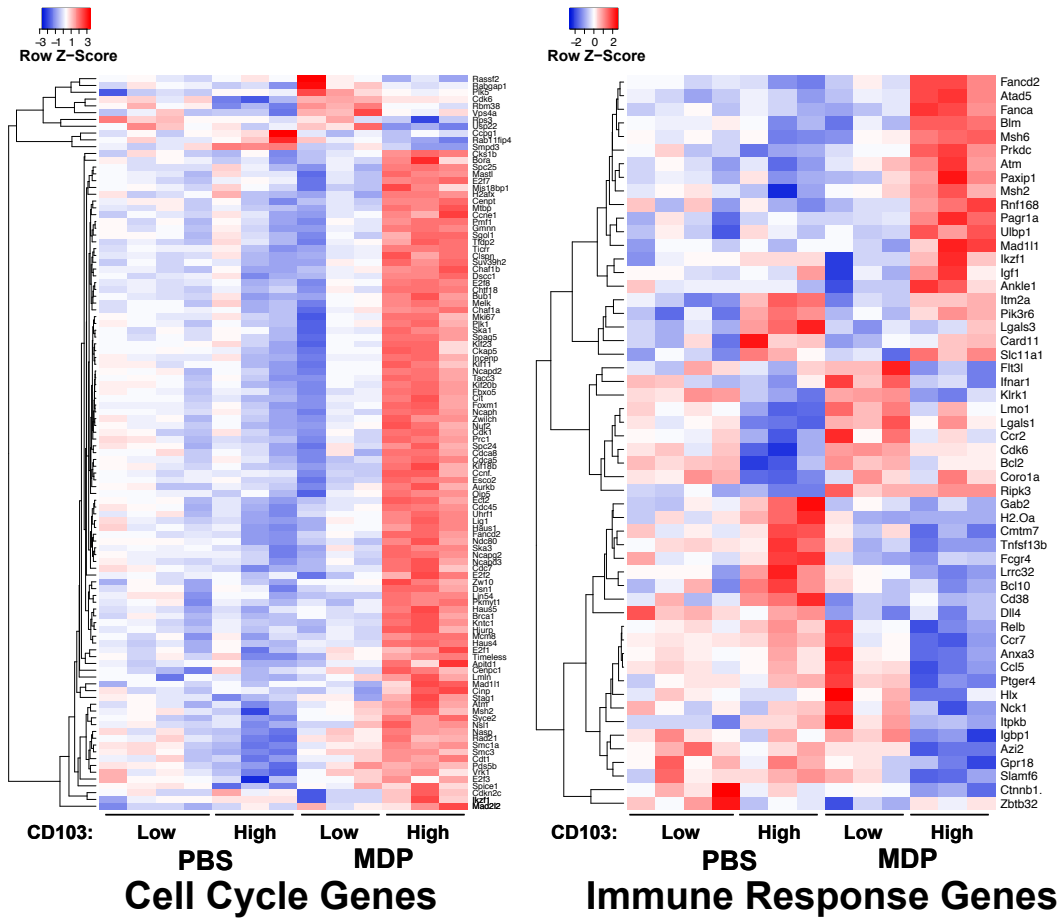

**Figure S10: Significant changes in gene expression in CD103<sup>hi</sup> cDC1s induced by MDP injection.** Splenocytes from mice injected with MDP or PBS were sorted into CD103<sup>hi</sup> and CD103<sup>lo</sup> via FACS. Microarray analysis revealed a number of genes whose expression was significantly altered in MDP<sup>hi</sup> dendritic cells. (a) Those genes that exhibited a fold-change of > 1.6 in comparison to the PBS<sup>lo</sup>, MDP<sup>lo</sup>, and PBS<sup>hi</sup> DCs are listed here, where the size of the bars indicates the magnitude of the change, and the color of the bars indicating increases (red) or decreases (blue) in gene expression. (b) Heat map displaying genes described as being involved in the regulation of the cell cycle. Red indicates higher expression relative to the group average, while blue indicates decreased expression relative to the group average.

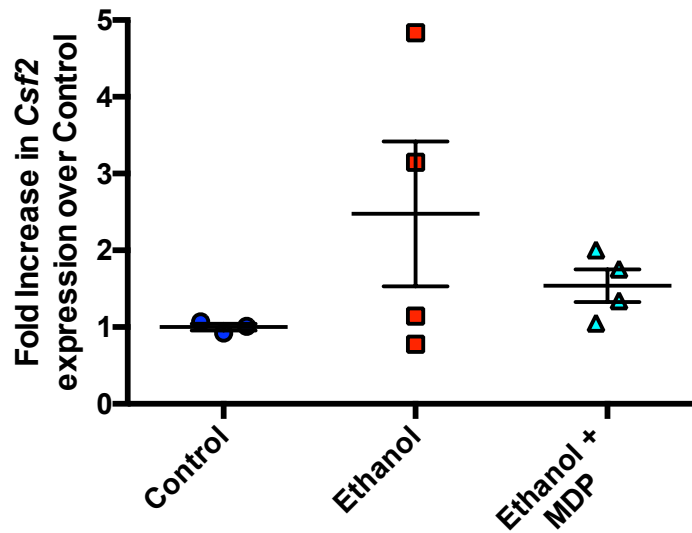

**Figure S11: Intrarectal administration of ethanol or MDP induces *Csf2* gene expression in the colon.** Gene expression analysis of whole-thickness colon tissue collected 2h post-administration of either PBS (control), 50% ethanol, or MDP delivered in 50% ethanol as assessed by qPCR. Fold expression over the average *Csf2* expression level in control mice was calculated using the  $\Delta\Delta CT$  method. Individual mice from one experiment are shown on the graph.



Table S1: Antibodies Used in this study

| TARGET                 | FLUOROPHORE                    | CLONE       |
|------------------------|--------------------------------|-------------|
| CD4                    | FITC<br>Or<br>APC              | RM4-5       |
| FoxP3                  | APC                            | FJK-16S     |
| TCRb                   | APC-eFluor 780                 | H57-597     |
| CD45.2                 | PerCP-Cyanine 5.5              | 104         |
| CD90.1                 | Super Bright 645               | HIS51       |
| CD11c                  | PE-Cyanine 7                   | N418        |
| MHC Class II (I-A/I-E) | eFluor 450<br>or<br>eVolve 655 | M5/114.15.2 |
| CD103                  | APC                            | 2E7         |
| CD8 $\alpha$           | Alexa Fluor 700                | 53-6.7      |
| CD205                  | PE-eFluor 610                  | 205yekta    |
| CD24                   | eFluor 450                     | M1/69       |
| XCR1*                  | FITC                           | ZET         |
| Clec9a                 | PerCP-eFluor 710               | 42D2        |
| CD11b                  | APC-eFluor 780                 | M1/70       |
| SIRP $\alpha$          | PE                             | P84         |
| Gr1                    | Alexa Fluor 700                | RB6-8C5     |
| KLRG1                  | FITC                           | 2F1         |
| CD127                  | PE-Cyanine 7                   | SB/199      |
| BrdU                   | FITC                           | BU20A       |

All antibodies purchased from Life Technologies with the exception of \* (Biolegend)

Table S2: Sequences of PCR primers used in this study

| Target      | Forward               | Reverse                 |
|-------------|-----------------------|-------------------------|
| <i>CSF2</i> | GGCTAAGGTCCTGAGGAGGAT | ACCTCTTCATTCAACGTGACAGG |
| 18s         | CGCGGTTCTATTTTGTGGT   | AGTCGGCATCGTTTATGGTC    |

## References

64. Mach N, et al. (2000) Differences in dendritic cells stimulated in vivo by tumors engineered to secrete granulocyte-macrophage colony-stimulating factor or Flt3-ligand. *Cancer Res* 60(12):3239–3246.
65. Shoemaker JE, et al. (2012) CTen: a web-based platform for identifying enriched cell types from heterogeneous microarray data. *BMC Genomics* 13(1):460.
66. Babicki S, et al. (2016) Heatmapper: web-enabled heat mapping for all. *Nucleic Acids Res* 44(W1):W147–53.
